# Supplementary figures and images for: Comparative genomics modeling of the NRSF/REST repressor network: From single conserved sites to genome-wide repertoire
Source: HighWire-hosted journal article supplement (doi:10.1101/gr.4997306), 2006-09-08

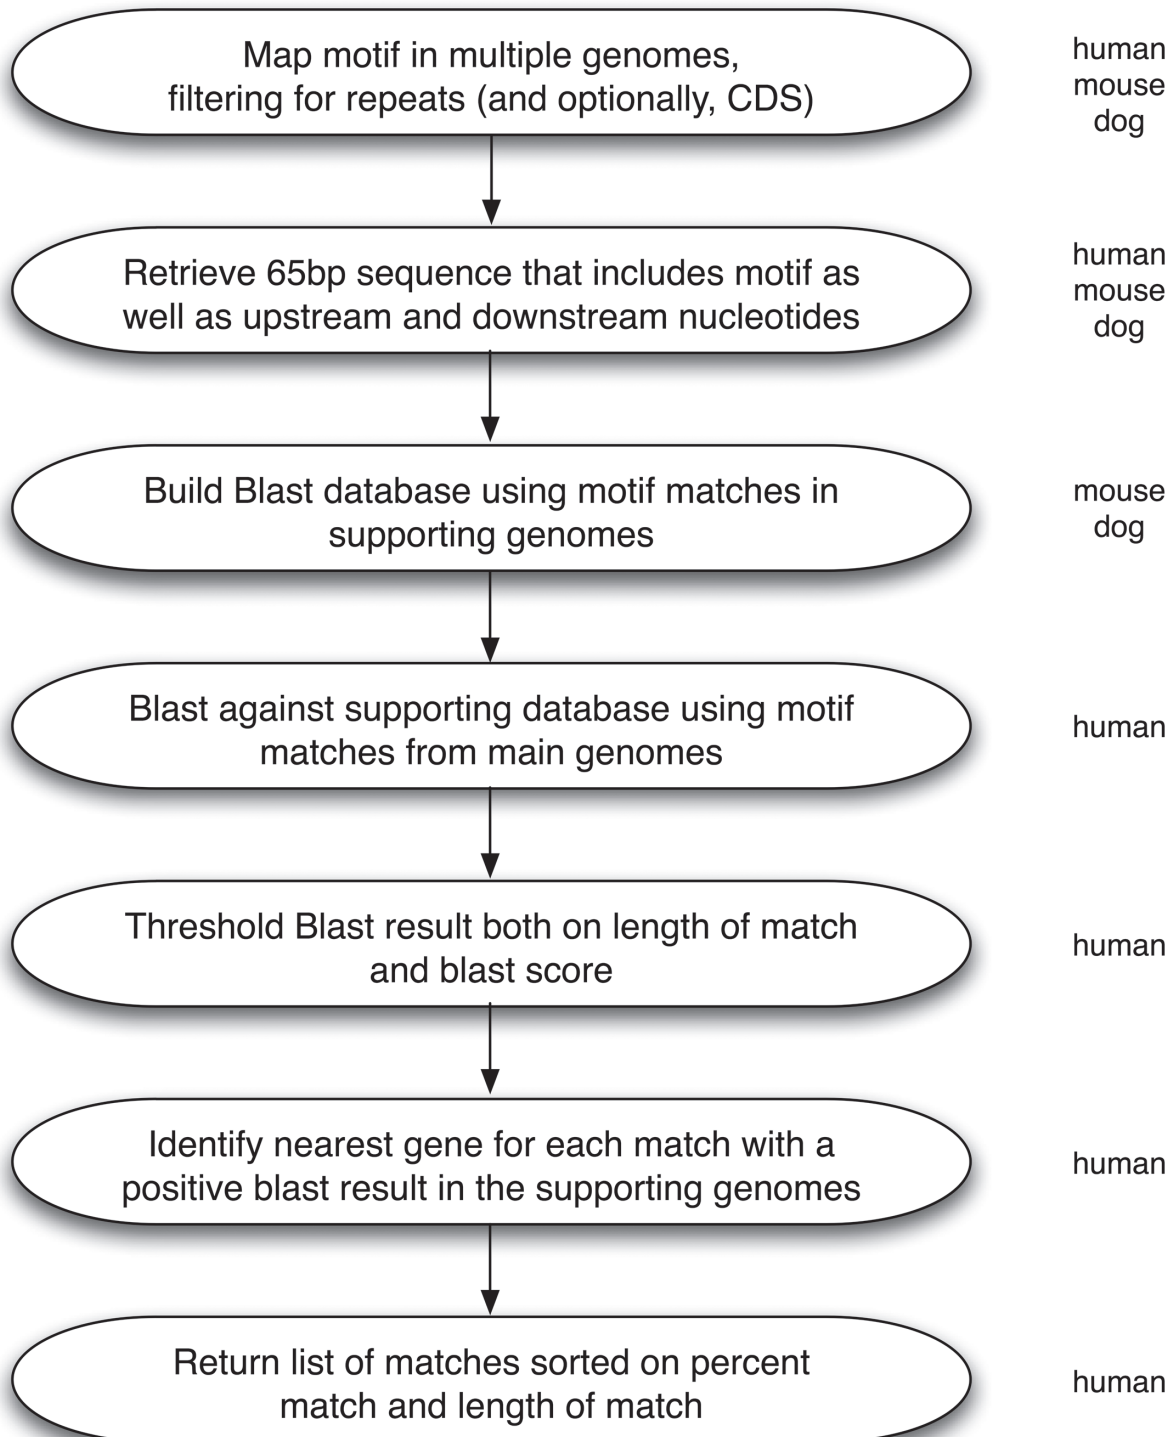

Supplement: Mortazavi_FigS2.pdf [file Mortazavi_FigS2.pdf]
